# Supplementary material
Source: PubMed Central journal article supplement (PMC4871800)
Supplement: supp_fj.201500173_Supplemental_Figure1.pdf [file supp_fj.201500173_Supplemental_Figure1.pdf]

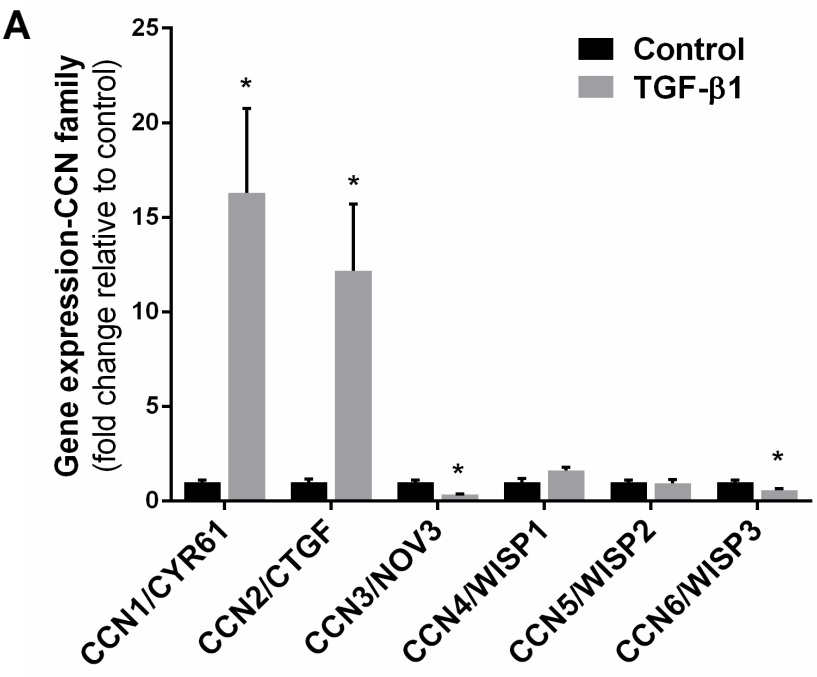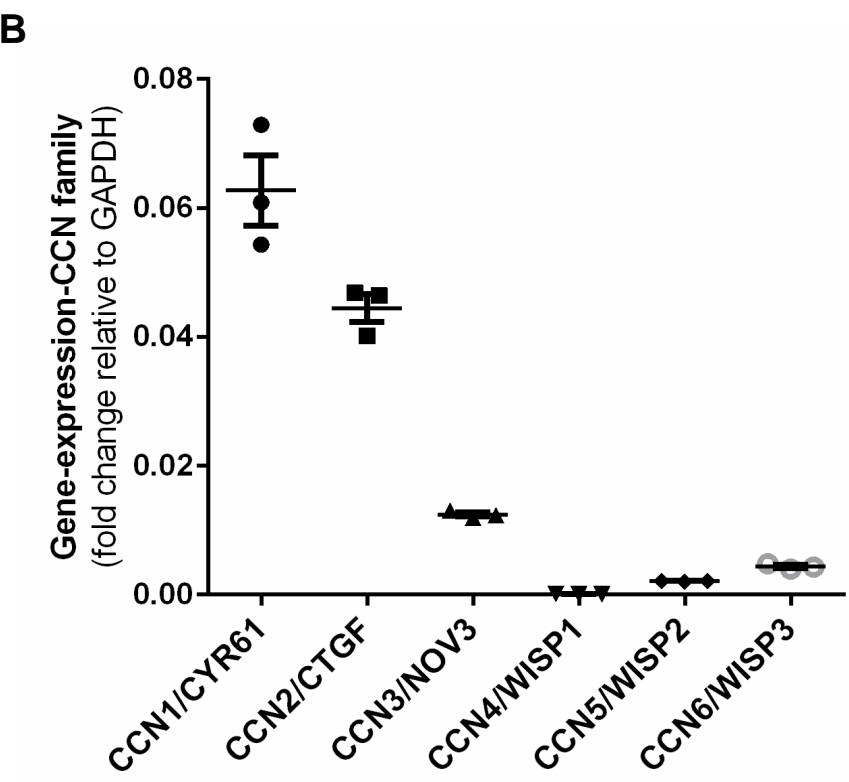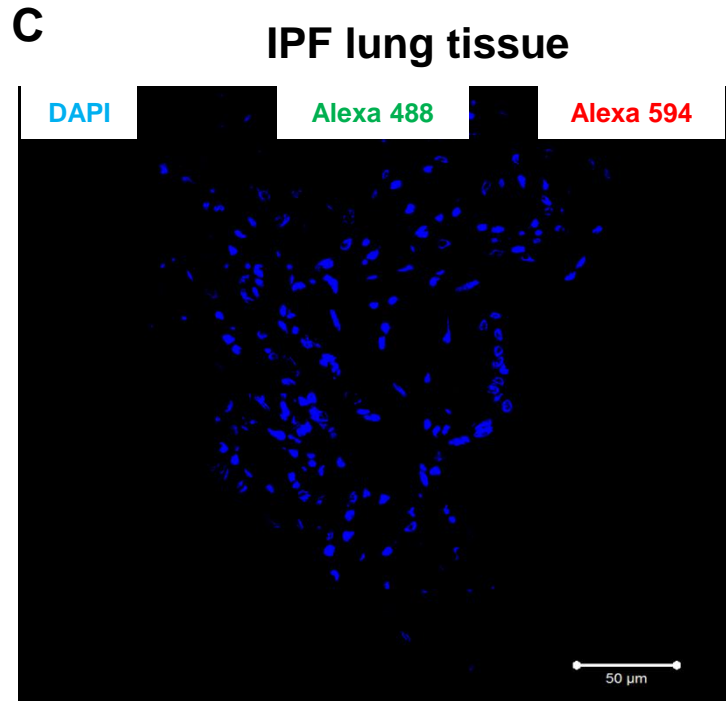

**Supplementary Figure 1: (A) TGF-β1 up-regulates CCN1 in lung fibroblasts.** Relative mRNA expression of genes of CCN family in primary adult lung fibroblasts treated with or without TGF-β1 (2 ng/ml) for 24 h by RT-PCR. **(B) Relative gene expression of CCN family genes in lung fibroblasts.** RT-PCR showing the basal mRNA levels of genes of CCN family in untreated IMR-90 fibroblasts relative to GAPDH. **(C) Negative control for immunofluorescence staining with secondary antibody alone.** IPF lung tissue section stained with secondary antibody control (Alexa 488 and Alexa 594 1: 500) shows only nuclear staining of DAPI.
