# Supplementary material
Source: PubMed Central journal article supplement (PMC4871800)
Supplement: supp_fj.201500173_Supplemental_Figure2.pdf [file supp_fj.201500173_Supplemental_Figure2.pdf]

A

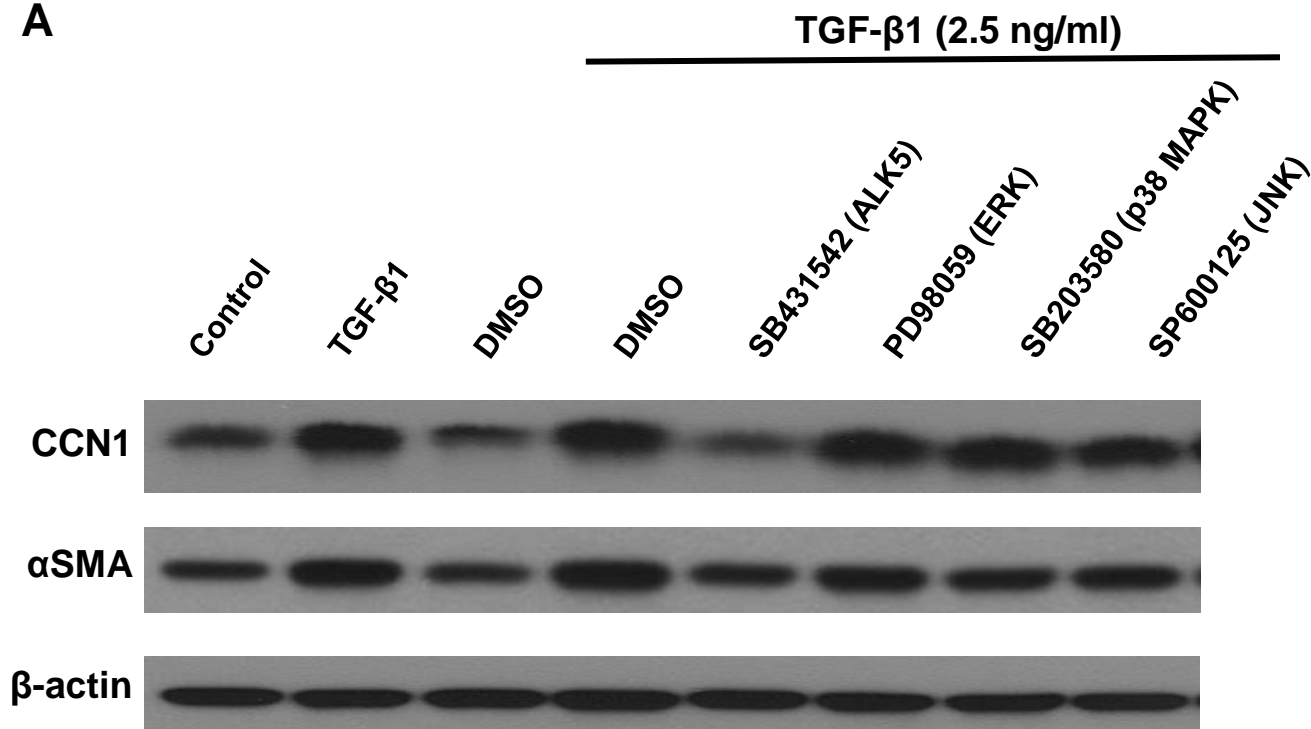

B

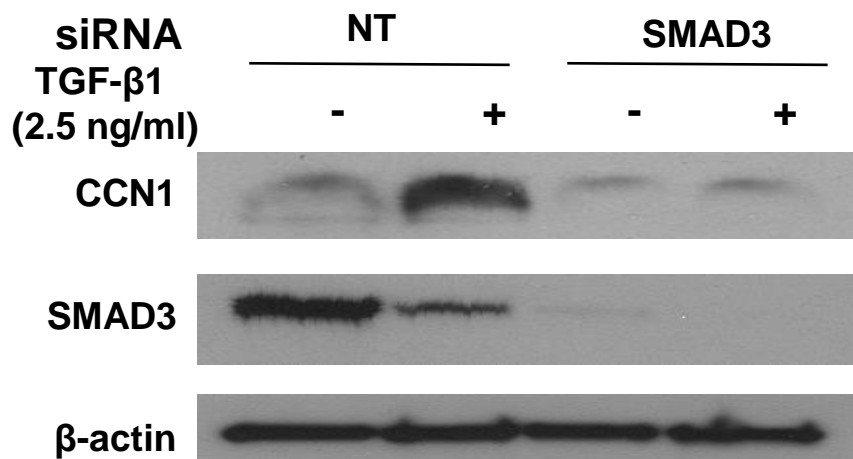

**Supplementary Figure 2: TGF- $\beta$ 1 mediated CCN1 up-regulation is ALK5/SMAD3-dependent in lung fibroblasts** (A) IMR-90 fibroblasts were pre-treated with chemical inhibitors type 1 TGF- $\beta$  receptor (T $\beta$ R1/ALK5; SB431542, 1  $\mu$ M), extracellular-signal-regulated kinases (ERK; PD98059, 10  $\mu$ M), p38 mitogen-activated protein kinases (MAPK; SB203580, 6  $\mu$ M), and c-Jun N-terminal protein kinases (JNK; SP600125, 100 nM) for 45 min and then treated with TGF- $\beta$ 1 (2.5 ng/ml) for 24 h. (B) IMR-90 fibroblasts were transfected with NT and SMAD3 siRNA (100 nM) for 2 days, then serum starved for 24 h and treated with TGF- $\beta$ 1 (2.5 ng/ml) for 24 h. Expression of CCN1 was evaluated by immunoblotting.
