# Supplementary material
Source: PubMed Central journal article supplement (PMC4871800)
Supplement: supp_fj.201500173_Supplemental_Figure3.pdf [file supp_fj.201500173_Supplemental_Figure3.pdf]

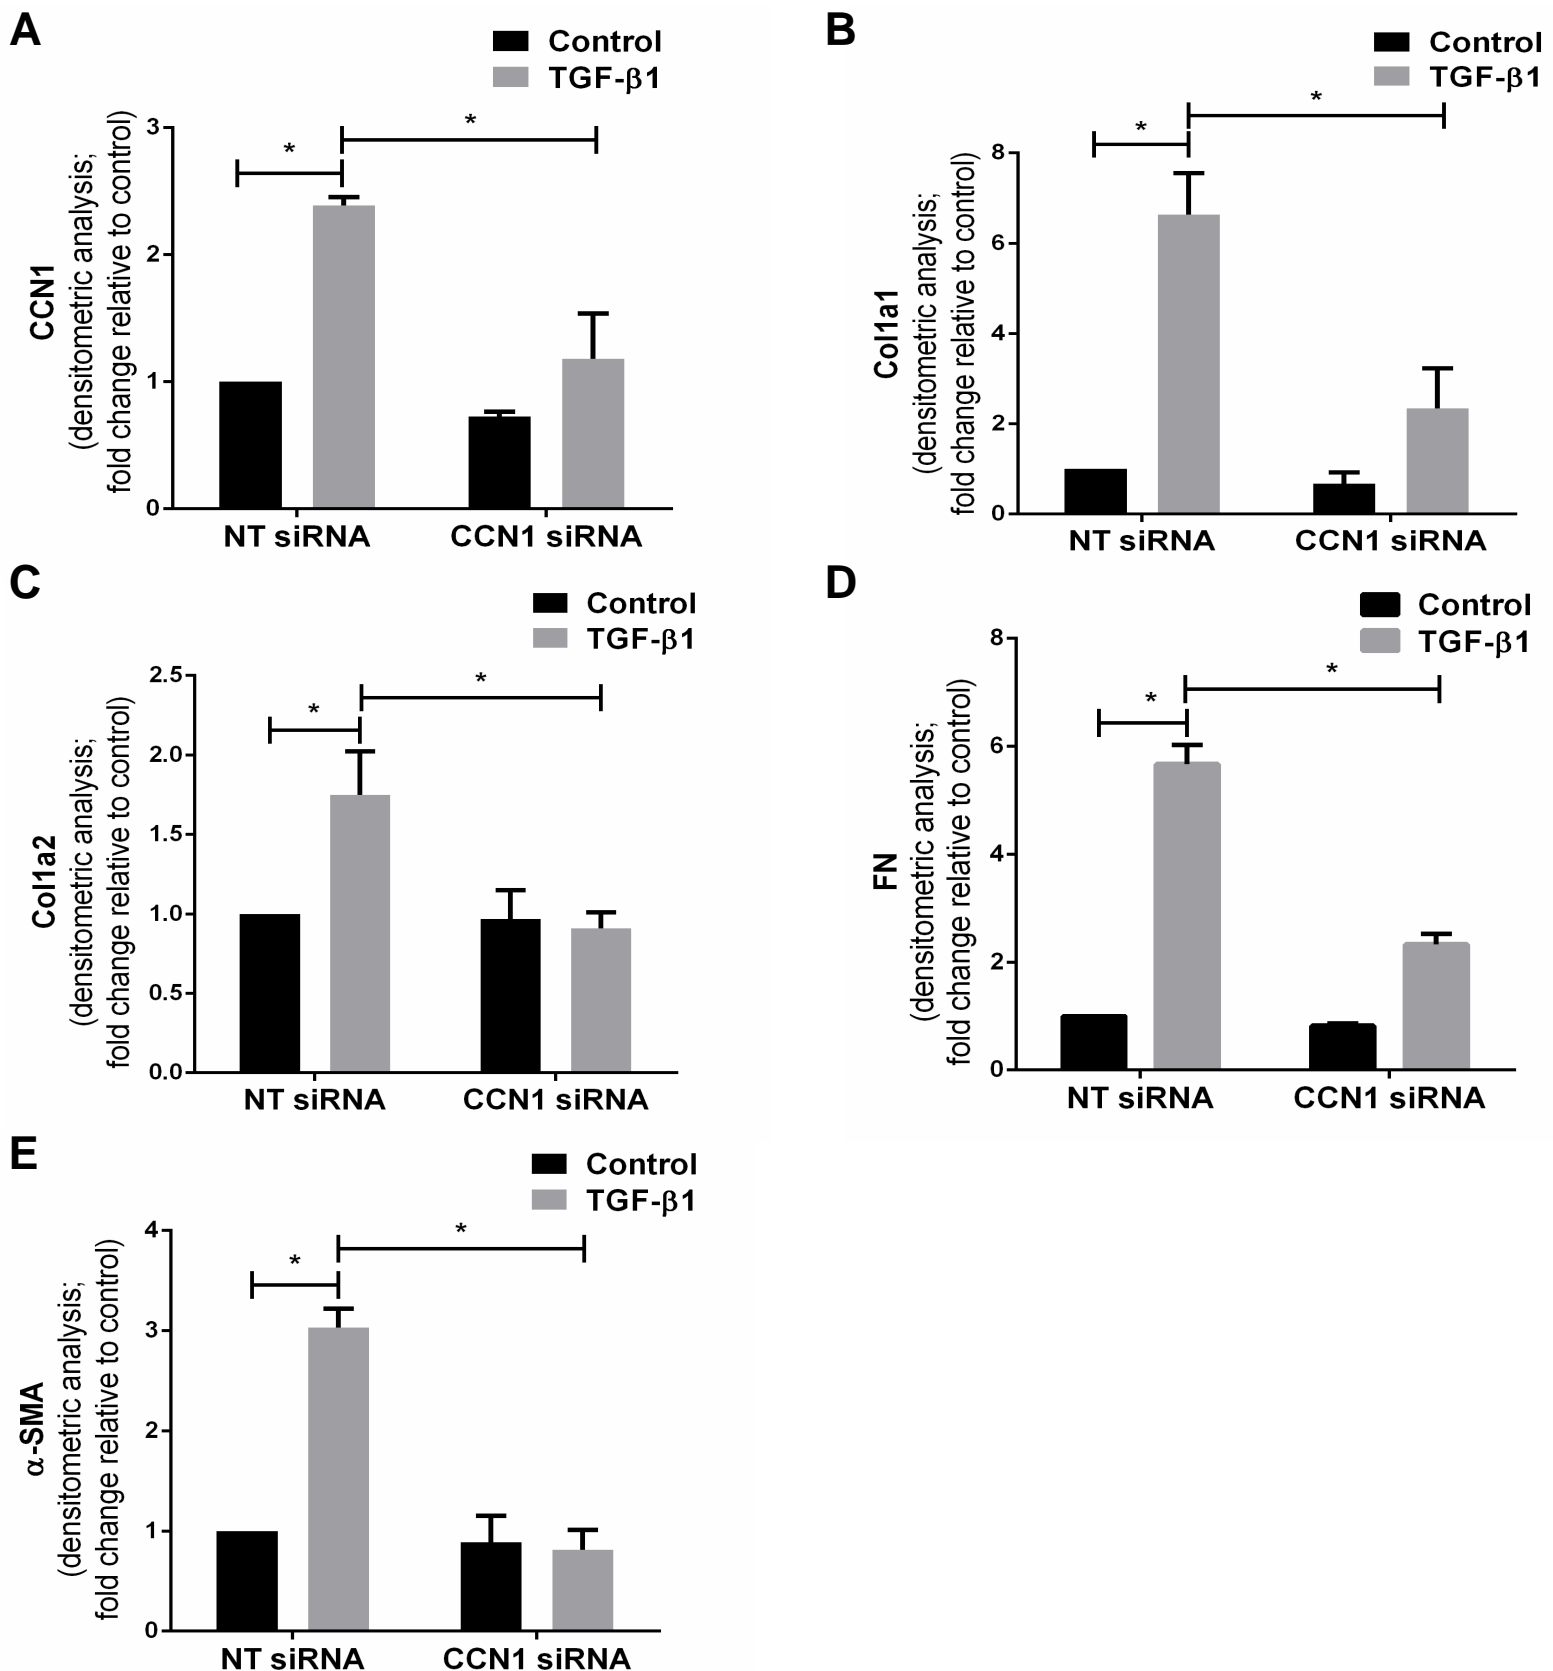

**Supplementary Figure 3: CCN1 knockdown impairs TGF-β1-induced expression of pro-fibrotic proteins in IPF fibroblasts.** IPF fibroblasts (n = 3) were subjected to NT and CCN1 siRNA (final concentration = 100 nM) for 2 days, media changed to serum free 24 h and then treated with TGF-β1 (2.5 ng/ml) for 24 h. (A-E) Graphs represent the densitometric analyses of protein expression of CCN1 (A), Col1a1 (B), Col1a2 (C), FN (D), and α-SMA (E). Data represents mean ± SEM of 3 IPF fibroblast cell lines. Two way ANOVA was performed between groups with significance set at  $p < 0.05$ .
